# Supplementary material for: Organically templated open-framework phosphites
Source: Royal Society of Chemistry journal article supplement (doi:10.1039/b808795b), 2009-01-01
Supplement: b808795b.pdf [file b808795b.pdf]

| SBU    | Fórmula                                                                                                                                                                                                                                                                                                                                                                                                                                                                                                                                                                                                                                                                   |
|--------|---------------------------------------------------------------------------------------------------------------------------------------------------------------------------------------------------------------------------------------------------------------------------------------------------------------------------------------------------------------------------------------------------------------------------------------------------------------------------------------------------------------------------------------------------------------------------------------------------------------------------------------------------------------------------|
| 1O     | $[C_6N_4H_{21}]_2[Fe^{II}_4(HPO_3)_2(C_2O_4)_5] \cdot 5H_2O$ <sup>40</sup>                                                                                                                                                                                                                                                                                                                                                                                                                                                                                                                                                                                                |
| 1P1t   | $Me(CH_2CH_2)_2N(Me)H[(VO_4)(OH)_2(HPO_3)_4]$ <sup>22</sup>                                                                                                                                                                                                                                                                                                                                                                                                                                                                                                                                                                                                               |
| 1O1t   | $(C_2N_2H_{10})[M(HPO_3)F_3]$ (M <sup>III</sup> = V, Cr, Fe) <sup>14,26</sup><br>$[C_6N_2H_{14}]_2[Fe^{III}_2F_2(HPO_3)_2(C_2O_4)_2]$ <sup>40</sup><br>$[HN(CH_2CH_2)_3N][(V^{IV}O_2)(HPO_3)_2(OH)(H_2O)] \cdot H_2O$ <sup>51</sup>                                                                                                                                                                                                                                                                                                                                                                                                                                       |
| 1O2t   | $Fe^{III}(2,2' \text{-bipyridine})(HPO_3)(H_2PO_4)$ <sup>36</sup><br>$Fe^{III}(1,10\text{-phenanthroline})(HPO_3)(H_2PO_3)$ <sup>37</sup><br>$(C_6N_2H_{16})[V^{III}(OH)_2(V^{IV}O_2)(HPO_3)_4] \cdot H_3O$ <sup>52</sup><br>$(C_2N_2H_{10})[Co(H_2O)_4Zn_4(HPO_3)_6]$ <sup>53</sup><br>$(C_2N_2H_{10})_{0.5}[M^{III}(HPO_3)_2]$ <sup>83</sup>                                                                                                                                                                                                                                                                                                                            |
| 2T2t   | $(C_2N_2H_{10})[Co(H_2O)_4Zn_4(HPO_3)_6]$ <sup>53</sup><br>$[Co(HPO_3)(C_{22}N_4H_{18})] \cdot H_2O$ <sup>50</sup><br>$[Co(HPO_3)(C_{14}N_4H_{14})_{0.5}]H_2O$ <sup>50</sup><br>$[Co_2(HPO_3)_2(C_{12}N_4H_{10})_{1.5}H_2O]1.5H_2O$ <sup>50</sup><br>$(C_{18}N_4H_{16})_{0.5}[Co(HPO_3)]$ <sup>50</sup>                                                                                                                                                                                                                                                                                                                                                                   |
| 1P1T2t | $Co_2(HPO_3)_2(C_{22}N_4H_{18})_2H_2O] \cdot H_2O$ <sup>50</sup>                                                                                                                                                                                                                                                                                                                                                                                                                                                                                                                                                                                                          |
| 2P2t   | $[HN(CH_2CH_2)_3N][(V^{IV}O_2)(HPO_3)_2(OH)(H_2O)] \cdot H_2O$ <sup>51</sup><br>$(C_6N_2H_{16})[V^{III}(OH)_2(V^{IV}O_2)(HPO_3)_4] \cdot H_3O$ <sup>52</sup>                                                                                                                                                                                                                                                                                                                                                                                                                                                                                                              |
| 2O1t   | $[C_4N_2H_{12}][M^{II}_4(HPO_3)_2(C_2O_4)_3]$ (M=Fe,Co) <sup>39,60</sup><br>$(C_5N_2H_{14})[Fe^{II}_4(HPO_3)_2(C_2O_4)_3]$ <sup>40</sup>                                                                                                                                                                                                                                                                                                                                                                                                                                                                                                                                  |
| 2O2t   | $(C_4N_2H_{12})[Fe^{II}_{0.86}Fe^{III}_{0.14}(HPO_3)_{1.39}(HPO_4)_{0.47}(PO_4)_{0.14}F_3]$ <sup>34</sup><br>$(C_4N_2H_{12})[Fe^{II}Fe^{III}(HPO_3)_2F_3]$ <sup>35</sup><br>$(C_{14}N_4H_{14})[Co(HPO_3)(H_2O)_2] \cdot 2H_2O$ <sup>60</sup><br>$(C_6N_2H_{16})_{0.5}[M^{II}(HPO_3)F]$ (M= Fe, Co) <sup>56</sup><br>$[C_6N_4H_{21}]_2[Fe^{II}_4(HPO_3)_2(C_2O_4)_5] \cdot 5H_2O$ <sup>40</sup><br>$[Co_2(HPO_3)_2(C_{12}N_4H_{10})_{1.5}H_2O]1.5H_2O$ <sup>50</sup><br>$[C_4N_2H_{12}][Mn^{II}_4(HPO_3)_2(C_2O_4)_3]$ <sup>90</sup><br>$(C_2N_2H_{10})[Fe^{II}_2(OH)_2(HPO_3)_2(C_2O_4)]$ <sup>40</sup><br>$(C_5N_2H_{14})[VO(H_2O)]_3(HPO_3)_4 \cdot H_2O$ <sup>87</sup> |
| 2O3t   | $(C_5N_2H_{14})[VO(H_2O)]_3(HPO_3)_4 \cdot H_2O$ <sup>87</sup>                                                                                                                                                                                                                                                                                                                                                                                                                                                                                                                                                                                                            |
| 2O5t   | $(C_4N_2H_{12})[Fe_4(H_2O)_3(HPO_3)_7] \cdot (H_2O)_{0.6}$ <sup>81</sup>                                                                                                                                                                                                                                                                                                                                                                                                                                                                                                                                                                                                  |
| 3O3t   | $(C_4N_2H_{12})_{0.5}(C_4N_2H_{11})[V^{III}_4(HPO_3)_7(H_2O)_3] \cdot 1.5H_2O$ <sup>89</sup>                                                                                                                                                                                                                                                                                                                                                                                                                                                                                                                                                                              |
| 3O4t   | $(C_nH_{2n+6}N_2)[M^{II}_3(HPO_3)_4]$ (n = 2-8) (M = Mn, Fe, Co) <sup>12,57-59</sup><br>$(C_2N_2H_{10})[(VO)_3(H_2O)(HPO_3)_4] \cdot H_2O$ <sup>85</sup><br>$(CN_3H_6)_2[(VO)_3(H_2O)_3(HPO_3)_4] \cdot 3H_2O$ <sup>86</sup><br>$(C_4N_2H_{12})[(VO)_3(HPO_3)_4(H_2O)_2]$ <sup>22</sup><br>$(C_8N_4H_{26})[Fe^{III}_6(HPO_3)_8(C_2O_4)_3] \cdot 4H_2O$ <sup>40</sup><br>$2H_3O \cdot [Co_8(HPO_3)_9(CH_3OH)_3] \cdot 2H_2O$ <sup>91</sup>                                                                                                                                                                                                                                 |
| 3O6t   | $(C_5N_3H_{18})[Fe_3(HPO_3)_6] \cdot 3H_2O$ <sup>79</sup>                                                                                                                                                                                                                                                                                                                                                                                                                                                                                                                                                                                                                 |

O = Octaedro; P = Pirámide; T = Tetraedro; t = pseudotetraedro grupo fosfito

**TABLE I. SBU distribution of the different magnetic phases**

| SBU    | Fórmula                                                                                                                                                                                                                                                                                                                                                                                                                                                                                                                                                                                                                                                                                                                                                                                                                                                                                                                                                                                                                                                                                                                                                                                                                                                                                                                                                                                                                                                                                                                                                                                                                                                                                                                                                                                                                                                                                                                                                                                                                                                                                                                              |
|--------|--------------------------------------------------------------------------------------------------------------------------------------------------------------------------------------------------------------------------------------------------------------------------------------------------------------------------------------------------------------------------------------------------------------------------------------------------------------------------------------------------------------------------------------------------------------------------------------------------------------------------------------------------------------------------------------------------------------------------------------------------------------------------------------------------------------------------------------------------------------------------------------------------------------------------------------------------------------------------------------------------------------------------------------------------------------------------------------------------------------------------------------------------------------------------------------------------------------------------------------------------------------------------------------------------------------------------------------------------------------------------------------------------------------------------------------------------------------------------------------------------------------------------------------------------------------------------------------------------------------------------------------------------------------------------------------------------------------------------------------------------------------------------------------------------------------------------------------------------------------------------------------------------------------------------------------------------------------------------------------------------------------------------------------------------------------------------------------------------------------------------------------|
| 1T1t   | $(C_6N_2H_{10})Zn(HPO_3)_2^{20}$ , $(H_3N(CH_2)_3NH_3)Zn(HPO_3)_3^{13}$ , $(C_4H_6N_2)Zn(HPO_3)_4^{42}$ ,<br>$(C_4N_2O_3H_8)ZnHPO_3^{45}$ , $[(C_4N_3OH_7)ZnHPO_3]H_2O^{19}$ ,<br>$(TMPD)_2Zn_2(HPO_3)_2 \cdot (catechol)_2^{47}$ , $(C_4NH_{12})_2[Zn_3(HPO_3)_4]^{103}$ ,<br>$(C_4N_2H_{12})Zn_3(HPO_3)_4^{67}$ , $(C_6N_2H_8)_{0.5}[Zn(HPO_3)]^{20}$ ,<br>$\{(C_4N_2H_{12})[Zn_5(HPO_3)_6(C_4N_2H_{10})]\}_n^{120}$                                                                                                                                                                                                                                                                                                                                                                                                                                                                                                                                                                                                                                                                                                                                                                                                                                                                                                                                                                                                                                                                                                                                                                                                                                                                                                                                                                                                                                                                                                                                                                                                                                                                                                               |
| 1P1t   | $Zn_3(tren)(HPO_3)_3 \cdot 0.5H_2O^{(74)}$                                                                                                                                                                                                                                                                                                                                                                                                                                                                                                                                                                                                                                                                                                                                                                                                                                                                                                                                                                                                                                                                                                                                                                                                                                                                                                                                                                                                                                                                                                                                                                                                                                                                                                                                                                                                                                                                                                                                                                                                                                                                                           |
| 1T2t   | $(C_5H_{12}N_2)[Zn_3(HPO_3)_4] \cdot H_2O^{18}$ , $[(C_4N_2H_{12})(C_5NH_4)]_4[Zn_6(HPO_3)_8]^{41}$ ,<br>$(C_6N_2H_{16})Zn_3(HPO_3)_2 \cdot H_2O^{70}$ , $(C_6N_2H_{15})_2[Zn_4(PO_4)_2(HPO_3)_2]^{71}$ ,<br>$(C_6N_4H_{22})_{0.5}[Zn_2(HPO_3)_3]^{75}$ , $(C_4NH_{12})_2[Zn_3(HPO_3)_4]^{103}$ , $(C_5NH_{12})[Zn_3(HPO_3)_4]^{41}$ ,<br>$^{11}$ , $(CN_4H_7)_2Zn_3(HPO_3)_4^{107}$ , $(C_6N_2H_{18})[Zn_3(HPO_3)_4]^{108}$ , $(CN_3H_6)_2[Zn(HPO_3)_2]^{16}$ ,<br>$\alpha\text{-}(C_6N_2H_{18})[Zn_3(HPO_3)_4]^{68}$ , $(C_3N_2H_5)[Zn_{1.5}(HPO_3)_2]^{75}$ ,<br>$(C_6H_{11}NH_3)_2[Zn_2Al_{0.57}Cr_{0.10}(HPO_3)_4](H_2O)_4^{104}$ , $(C_6H_4(CNH_5)_2) \cdot [Zn_3(HPO_3)_4]^{109}$ ,<br>$(C_3NH_{10})_2[Zn_3(HPO_3)_4]^{109,41}$ , $(C_5N_2H_{16})[Zn_3(HPO_3)_4] \cdot H_2O^{110}$ ,<br>$(C_6N_3H_{12})_2[Zn_5(HPO_3)_6]^{111}$ , $\beta\text{-}(C_6N_2H_{18})[Zn_3(HPO_3)_4]^{112}$ ,<br>$(C_4N_2H_{12})_{0.5}[Zn_3(HPO_3)_4] \cdot H_3O^{113}$ , $(H_2mpipe)[Zn_3(HPO_3)_4]^{114}$ ,<br>$(H_2en)_{1.5}[Zn_{4.5}(HPO_3)_6]^{114}$ , $(CN_3H_6)_2[Zn_3(HPO_3)_4] \cdot H_2O^{18}$ ,<br>$(C_6H_{14}N_2)[Zn_3(HPO_3)_4]^{115}$ , $(C_4H_{12}N_2)[Zn_3(HPO_3)_4]^{115}$ ,<br>$\{(C_4N_2H_{12})[Zn_5(HPO_3)_6(C_4N_2H_{10})]\}_n^{120}$                                                                                                                                                                                                                                                                                                                                                                                                                                                                                                                                                                                                                                                                                                                                                                                                                                                                                           |
| 1P2t   | $Zn_2(4,4'\text{-dmbpy})_2(H_2PO_3)_4^{48}$ , $Zn_2(2,2'\text{-bipy})_2(H_2PO_3)_4^{49}$                                                                                                                                                                                                                                                                                                                                                                                                                                                                                                                                                                                                                                                                                                                                                                                                                                                                                                                                                                                                                                                                                                                                                                                                                                                                                                                                                                                                                                                                                                                                                                                                                                                                                                                                                                                                                                                                                                                                                                                                                                             |
| 1O2t   | $(C_4H_9NH_3)_2[MFZn_2(HPO_3)_4]$ (M = Al, Ga, Fe) <sup>105</sup>                                                                                                                                                                                                                                                                                                                                                                                                                                                                                                                                                                                                                                                                                                                                                                                                                                                                                                                                                                                                                                                                                                                                                                                                                                                                                                                                                                                                                                                                                                                                                                                                                                                                                                                                                                                                                                                                                                                                                                                                                                                                    |
| 2T1t   | $(C_6N_3H_{17})[Zn_4(PO_4)_2(HPO_3)_2]^{72}$                                                                                                                                                                                                                                                                                                                                                                                                                                                                                                                                                                                                                                                                                                                                                                                                                                                                                                                                                                                                                                                                                                                                                                                                                                                                                                                                                                                                                                                                                                                                                                                                                                                                                                                                                                                                                                                                                                                                                                                                                                                                                         |
| 2T2t   | $\beta\text{-}(C_2N_4H_4)ZnHPO_3^{14}$ , $(C_4N_2H_{10})(C_5NH_5)[Zn_2Cl_2(HPO_3)_2]^{41}$ ,<br>$Zn_2(phen)(HPO_3)_2^{46}$ , $Zn(phen)(HPO_3)_2^{46}$ ,<br>$(4,4'\text{-}(C_5H_4N)_2(CH_2)_3Zn_2(HPO_3)_2 \cdot 2.5H_2O^{47}$ , $\alpha\text{-}(C_2N_4H_4)[ZnHPO_3]^{10}$ ,<br>$(C_4N_3OH_7)[ZnHPO_3]^{19}$ , $[Zn_2(HPO_3)_2(C_{10}H_{10}N_2)_2]^{42}$ , $(C_5H_6N_2)[Zn(HPO_3)]^{65}$ ,<br>$(C_3H_{12}N_2)[Zn_3(HPO_3)_4] \cdot H_2O^{18}$ , $[(C_4N_2H_{12})(C_5NH_4)]_4[Zn_6(HPO_3)_8]^{41}$ ,<br>$(C_5H_{14}NO)[ZnCl(HPO_3)]^{68}$ , $(C_4N_3H_{15})[Zn(C_4N_3H_{13})][Zn_4(HPO_3)_6]^{69}$ ,<br>$(C_7NH_{10})_2[Zn_5(H_2O)_4(HPO_3)_6] \cdot H_2O^{69}$ , $(C_6N_2H_{16})Zn_3(HPO_3)_2 \cdot H_2O^{70}$ ,<br>$(C_6N_2H_{15})_2[Zn_4(PO_4)_2(HPO_3)_2]^{71}$ , $(C_6N_3H_{17})[Zn_4(PO_4)_2(HPO_3)_2]^{72}$ ,<br>$Zn_3(tren)(HPO_3)_3 \cdot 0.5H_2O^{74}$ , $(C_6N_4H_{22})_{0.5}[Zn_2(HPO_3)_3]^{75}$ , (DL-<br>$C_6H_9N_3O_2)Zn(HPO_3)_2 \cdot 0.5H_2O^{76}$ , $(TMPD)Zn_2(HPO_3)_2 \cdot 3H_2O^{47}$ ,<br>$(TMPD)Zn_2(HPO_3)_2 \cdot phenol^{47}$ , $(C_4H_9NH_3)_2[MFZn_2(HPO_3)_4]$ (M = Al, Ga, Fe) <sup>105</sup> ,<br>$(C_5NH_{12})[Zn_3(HPO_3)_4]^{11}$ , $(TMPD)Zn_3(HPO_3)_4^{47}$ , $(CN_4H_7)_2Zn_3(HPO_3)_4^{107}$ ,<br>$(C_6N_2H_{18})[Zn_3(HPO_3)_4]^{108}$ , $\alpha\text{-}(C_6N_2H_{18})[Zn_3(HPO_3)_4]^{68}$ ,<br>$(C_3N_2H_5)[Zn_{1.5}(HPO_3)_2]^{75}$ , $(C_6H_4(CNH_5)_2) \cdot [Zn_3(HPO_3)_4]^{109}$ ,<br>$(C_3NH_{10})_2[Zn_3(HPO_3)_4]^{109,41}$ , $(C_5N_2H_{16})[Zn_3(HPO_3)_4] \cdot H_2O^{110}$ , $\beta\text{-}$<br>$(C_6N_2H_{18})[Zn_3(HPO_3)_4]^{112}$ , $(C_4N_2H_{12})Zn_3(HPO_3)_4^{67}$ ,<br>$(C_4N_2H_{12})_{0.5}[Zn_3(HPO_3)_4] \cdot H_3O^{113}$ , $(H_2mpipe)[Zn_3(HPO_3)_4]^{114}$ ,<br>$(H_2en)_{1.5}[Zn_{4.5}(HPO_3)_6]^{114}$ , $(CN_3H_6)_2[Zn_3(HPO_3)_4] \cdot H_2O^{18}$ ,<br>$(C_6H_{14}N_2)[Zn_3(HPO_3)_4]^{115}$ , $(C_4H_{12}N_2)[Zn_3(HPO_3)_4]^{115}$ ,<br>$(4,4'\text{-bipy})[Zn(HPO_3)_2]^{116}$ , $(C_{14}N_4H_{14})_{0.5}[Zn(HPO_3)]^{42}$ , $(C_4N_2H_{12})_{0.5}[ZnHPO_3]^{117}$ ,<br>$(en)_{0.5}[Zn(HPO_3)]^{118}$ , $\beta\text{-}(en)_{0.5}[Zn(HPO_3)]^{119}$ |
| 2P2t   | $(C_4N_3H_{15})[Zn(C_4N_3H_{13})][Zn_4(HPO_3)_6]^{69}$                                                                                                                                                                                                                                                                                                                                                                                                                                                                                                                                                                                                                                                                                                                                                                                                                                                                                                                                                                                                                                                                                                                                                                                                                                                                                                                                                                                                                                                                                                                                                                                                                                                                                                                                                                                                                                                                                                                                                                                                                                                                               |
| 1P1T1t | $(C_6H_{13}NO_3)[Zn_2(HPO_3)]^{63}$                                                                                                                                                                                                                                                                                                                                                                                                                                                                                                                                                                                                                                                                                                                                                                                                                                                                                                                                                                                                                                                                                                                                                                                                                                                                                                                                                                                                                                                                                                                                                                                                                                                                                                                                                                                                                                                                                                                                                                                                                                                                                                  |
| 2T3t   | $(H_2DACH)[Zn_2(HPO_3)_3]^{64}$ $(C_4H_9N_2)[Zn_2(HPO_3)_3] \cdot H_2O^{66}$ ,<br>$(C_2N_2H_{10})[Zn_2(HPO_3)_3]^{67}$ , $(C_3N_2H_5)[Zn_2(HPO_3)_2(H_2PO_3)]^{73}$ ,<br>$(C_4N_2H_7)_2[Zn_2(HPO_3)_3] \cdot 2H_2O^{73}$                                                                                                                                                                                                                                                                                                                                                                                                                                                                                                                                                                                                                                                                                                                                                                                                                                                                                                                                                                                                                                                                                                                                                                                                                                                                                                                                                                                                                                                                                                                                                                                                                                                                                                                                                                                                                                                                                                             |
| 1O2T2t | $(C_7NH_{10})_2[Zn_5(H_2O)_4(HPO_3)_6] \cdot H_2O^{69}$                                                                                                                                                                                                                                                                                                                                                                                                                                                                                                                                                                                                                                                                                                                                                                                                                                                                                                                                                                                                                                                                                                                                                                                                                                                                                                                                                                                                                                                                                                                                                                                                                                                                                                                                                                                                                                                                                                                                                                                                                                                                              |

O = Octaedro; P = Pirámide; T = Tetraedro; t = pseudotetraedro grupo fosfito

TABLE II. SBU distribution of the non-magnetic phases
